# Supplementary material for: Boesenbergia rotunda and Its Pinostrobin for Atopic Dermatitis: Dual 5-Lipoxygenase and Cyclooxygenase-2 Inhibitor and Its Mechanistic Study through Steady-State Kinetics and Molecular Modeling
Source: MDPI journal article supplement (doi:10.3390/antiox13010074), 2024-01-05
Supplement: s1 [file s1]

## Supplementary Information

### ***Boesenbergia rotunda* and its pinostrobin for atopic dermatitis: Dual 5-lipoxygenase and cyclooxygenase-2 inhibitor and its mechanistic study through steady-state kinetics and molecular modeling**

Desy Liana<sup>1</sup>, Chatchakorn Eurtivong<sup>2</sup>, and Anuchit Phanumartwiwath<sup>1\*</sup>

<sup>a</sup>College of Public Health Sciences, Chulalongkorn University, Bangkok 10330, Thailand.

<sup>b</sup>Department of Pharmaceutical Chemistry, Faculty of Pharmacy, Mahidol University, Ratchathewi, Bangkok 10400, Thailand.

\*Corresponding author: Dr. Anuchit Phanumartwiwath; E-mail: [anuchit.p@chula.ac.th](mailto:anuchit.p@chula.ac.th)

**1. Extraction yield (%) of essential oils and hexane extracts derived from the selected medicinal plants**

**Table S1.** List of selected medicinal plants and percentage yields of their nonpolar fractions (essential oils and hexane extracts).

| No. | Plant species                    | Part used    | Essential oils |                              | Hexane extracts |                    |
|-----|----------------------------------|--------------|----------------|------------------------------|-----------------|--------------------|
|     |                                  |              | Yield (%)      | Characteristics              | Yield (%)       | Characteristics    |
| 1   | <i>A. vulgaris</i> L.            | Aerial part  | 0.183          | Yellow clear liquid          | 4.01            | Crude extract      |
| 2   | <i>B. rotunda</i> (L.) Mansf.    | Rhizome      | 0.216          | Yellowish clear liquid       | 2.43            | Oily crude extract |
| 3   | <i>C. sinensis</i> (L.) Kuntze   | Young leaves | 0.016          | Yellowish waxy liquid        | 5.74            | Crude extract      |
| 4   | <i>C. fistula</i> L.             | Leaves       | -              | -                            | 2.37            | Crude extract      |
|     |                                  | Pods         | -              | -                            | 0.63            | Crude extract      |
| 5   | <i>D. longan</i> Lour.           | Peel         | 0.013          | Yellowish liquid             | 0.44            | Crude extract      |
|     |                                  | Seed         | -              | -                            | 2.19            | Fixed oils         |
| 6   | <i>M. villosa</i> Huds.          | Aerial part  | 0.012          | Cloudy, waxy greenish liquid | 1.58            | Crude extract      |
| 7   | <i>W. trilobata</i> (L.) Hitchc. | Leaves       | 0.086          | Greenish clear liquid        | 2.53            | Crude extract      |

## 2. Total phenolic content of all plant extracts

**Table S2.** Determination of total phenolic content (TPC) values of all selected plants.

| No | Sample  | TPC value (mg gallic acid/g dry weight of extract) |        |        |                                  |
|----|---------|----------------------------------------------------|--------|--------|----------------------------------|
|    |         | 1                                                  | 2      | 3      | Mean $\pm$ SD                    |
| 1  | UAE BR  | 24.567                                             | 23.280 | 25.158 | 24.335 $\pm$ 0.960 <sup>i</sup>  |
| 2  | EO MV   | 20.184                                             | 21.610 | 19.628 | 20.474 $\pm$ 1.023 <sup>h</sup>  |
| 3  | UAE AV  | 16.428                                             | 18.584 | 16.045 | 17.019 $\pm$ 1.369 <sup>gh</sup> |
| 4  | UAE CSD | 17.610                                             | 16.845 | 15.315 | 16.590 $\pm$ 1.169 <sup>g</sup>  |
| 5  | UAE DLP | 15.697                                             | 15.419 | 15.489 | 15.535 $\pm$ 0.145 <sup>f</sup>  |
| 6  | EO DLP  | 11.419                                             | 11.558 | 10.097 | 11.025 $\pm$ 0.806 <sup>e</sup>  |
| 7  | UAE MV  | 9.228                                              | 8.671  | 7.419  | 8.439 $\pm$ 0.926 <sup>d</sup>   |
| 8  | EO BR   | 6.967                                              | 6.480  | 6.306  | 6.584 $\pm$ 0.343 <sup>c</sup>   |
| 9  | UAE WT  | 6.306                                              | 4.984  | 5.193  | 5.494 $\pm$ 0.711 <sup>bc</sup>  |
| 10 | UAE CFF | 4.184                                              | 4.010  | 5.019  | 4.405 $\pm$ 0.960 <sup>b</sup>   |
| 11 | EO WT   | 0.650                                              | 0.758  | 0.758  | 0.722 $\pm$ 0.062 <sup>a</sup>   |
| 12 | UAE CFL | 0.483                                              | 0.574  | 0.591  | 0.550 $\pm$ 0.058 <sup>a</sup>   |
| 13 | UAE DLS | 0.289                                              | 0.313  | 0.376  | 0.326 $\pm$ 0.045 <sup>a</sup>   |
| 14 | EO AV   | 0.268                                              | 0.344  | 0.299  | 0.304 $\pm$ 0.038 <sup>a</sup>   |
| 15 | EO CSD  | 0.268                                              | 0.351  | 0.282  | 0.300 $\pm$ 0.046 <sup>a</sup>   |

\*Note: UAE: hexane extract; EO: essential oils; BR: *Boesenbergia rotunda*; MV: *Mentha villosa*; AV: *Artemisia vulgaris*; CSD: *Camellia sinensis*; DLP: *Dimocarpus longan* peels; DLS: *Dimocarpus longan* seeds; CFF: *Cassia fistula* fruits; WT: *Wedelia trilobata*; and CFL: *Cassia fistula* leaves. One-way ANOVA was performed to compare the mean of each sample, and different letters indicate the significant difference of the mean.

### 3. Total flavonoid content of all plant extracts

**Table S3.** Determination of total flavonoid content (TFC) values of all selected plants.

| No | Sample  | TFC value (mg quercetin/g dry weight of extract) |         |         |                                  |
|----|---------|--------------------------------------------------|---------|---------|----------------------------------|
|    |         | 1                                                | 2       | 3       | Mean $\pm$ SD                    |
| 1  | UAE CSD | 105.851                                          | 109.957 | 101.904 | 105.904 $\pm$ 4.027 <sup>d</sup> |
| 2  | UAE MV  | 41.264                                           | 42.384  | 41.957  | 41.868 $\pm$ 0.565 <sup>c</sup>  |
| 3  | UAE CFL | 38.171                                           | 38.437  | 35.931  | 37.513 $\pm$ 1.377 <sup>b</sup>  |
| 4  | UAE CFF | 5.744                                            | 6.171   | 5.317   | 5.744 $\pm$ 0.427 <sup>a</sup>   |
| 5  | UAE AV  | 5.531                                            | 5.477   | 5.317   | 5.442 $\pm$ 0.111 <sup>a</sup>   |
| 6  | UAE WT  | 5.157                                            | 5.584   | 5.264   | 5.335 $\pm$ 0.222 <sup>a</sup>   |
| 7  | UAE BR  | 4.304                                            | 3.824   | 4.304   | 4.144 $\pm$ 0.244 <sup>a</sup>   |
| 8  | UAE DLP | 3.131                                            | 3.557   | 3.291   | 3.326 $\pm$ 0.145 <sup>a</sup>   |

\*Note: UAE: hexane extract; CSD: *C. sinensis*; MV: *M. villosa*; CFL: *C. fistula* leaves; CFF: *C. fistula* fruits; AV: *A. vulgaris*; WT: *W. trilobata*; BR: *B. rotunda*; and DLP: *D. longan* peels. One-way ANOVA was performed to compare the mean of each sample, and different letters indicate the significant difference of the mean.

4. Gas chromatography–mass spectrometry of *Boesenbergia rotunda* essential oils and hexane extracts

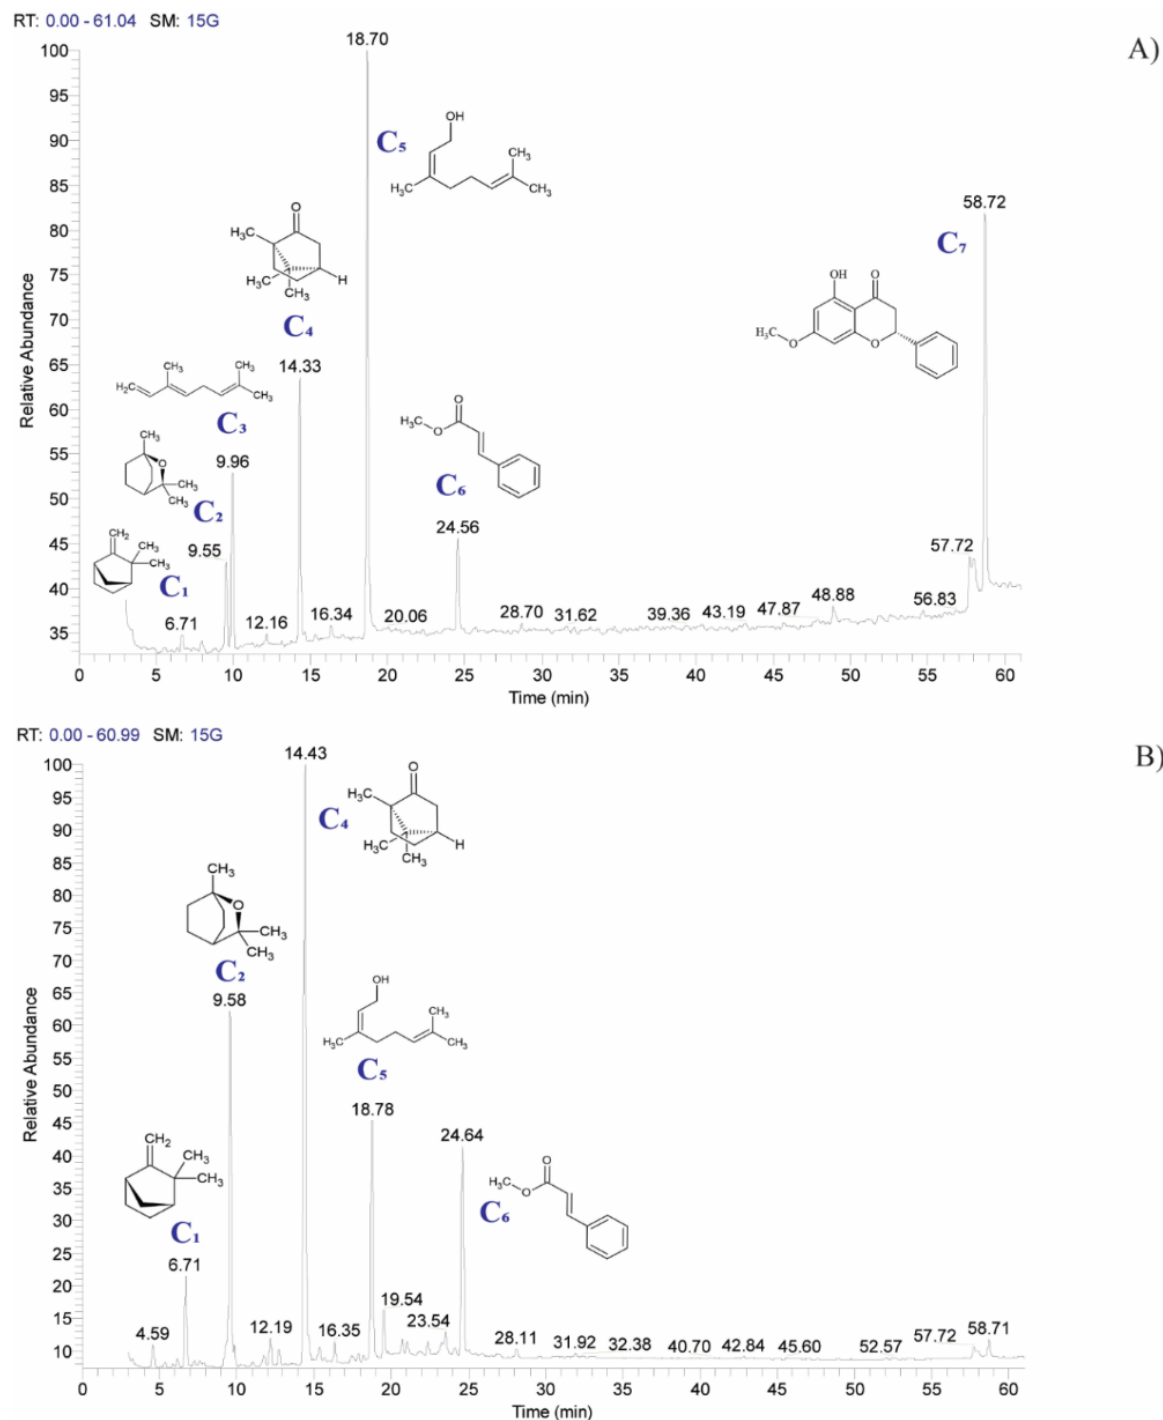

**Figure S1.** Gas Chromatography (GC) chromatograms of A). hexane extract and B). EOs of *B. rotunda*, and their major volatile components (C): camphene (C<sub>1</sub>), 1,8-cineole (C<sub>2</sub>), β-cis-ocimene (C<sub>3</sub>), camphor (C<sub>4</sub>), nerol (C<sub>5</sub>), methyl cinnamate (C<sub>6</sub>), and pinostrobin (C<sub>7</sub>).

**Table S4.** Chemical composition of volatile compounds of essential oils and hexane extract derived from *B. rotunda*.

| No. | RT*<br>(min) | Compound                  | % Abundance |                |
|-----|--------------|---------------------------|-------------|----------------|
|     |              |                           | EOs         | Hexane extract |
| 1   | 4.59         | 2-Hexenal                 | 1.30        | -              |
| 2   | 6.71         | Camphene                  | 4.97        | 1.57           |
| 3   | 9.58         | 1,8-cineole               | 20.47       | 4.80           |
| 4   | 9.96         | $\beta$ -cis-ocimene      | -           | 8.77           |
| 5   | 12.19        | Linalool                  | 1.36        | 1.09           |
| 6   | 14.43        | Camphor                   | 35.25       | 13.99          |
| 7   | 15.36        | Borneol                   | 1.36        | -              |
| 8   | 16.35        | $\alpha$ -terpineol       | 1.06        | 1.17           |
| 9   | 18.78        | Nerol                     | 13.86       | 32.76          |
| 10  | 19.54        | Citral                    | 2.92        | -              |
| 11  | 22.38        | cis-Limonene oxide        | 0.69        | -              |
| 12  | 23.54        | Limonene oxide            | 2.36        | -              |
| 13  | 24.64        | Methyl cinnamate          | 11.71       | 5.46           |
| 14  | 28.7         | (E) $\alpha$ -Bergamotene | -           | 0.88           |
| 15  | 48.88        | (Z) 6-Pentadecen-1-ol     | -           | 1.50           |
| 16  | 57.72        | (Z) 9-Octadecenamide      | 1.34        | 6.79           |
| 17  | 58.72        | Pinostrobin               | 1.33        | 21.22          |

\*RT based on the GC chromatogram of essential oils derived from *B. rotunda*.

## 5. Gas chromatography–mass spectrometry of *Camellia sinensis* essential oils

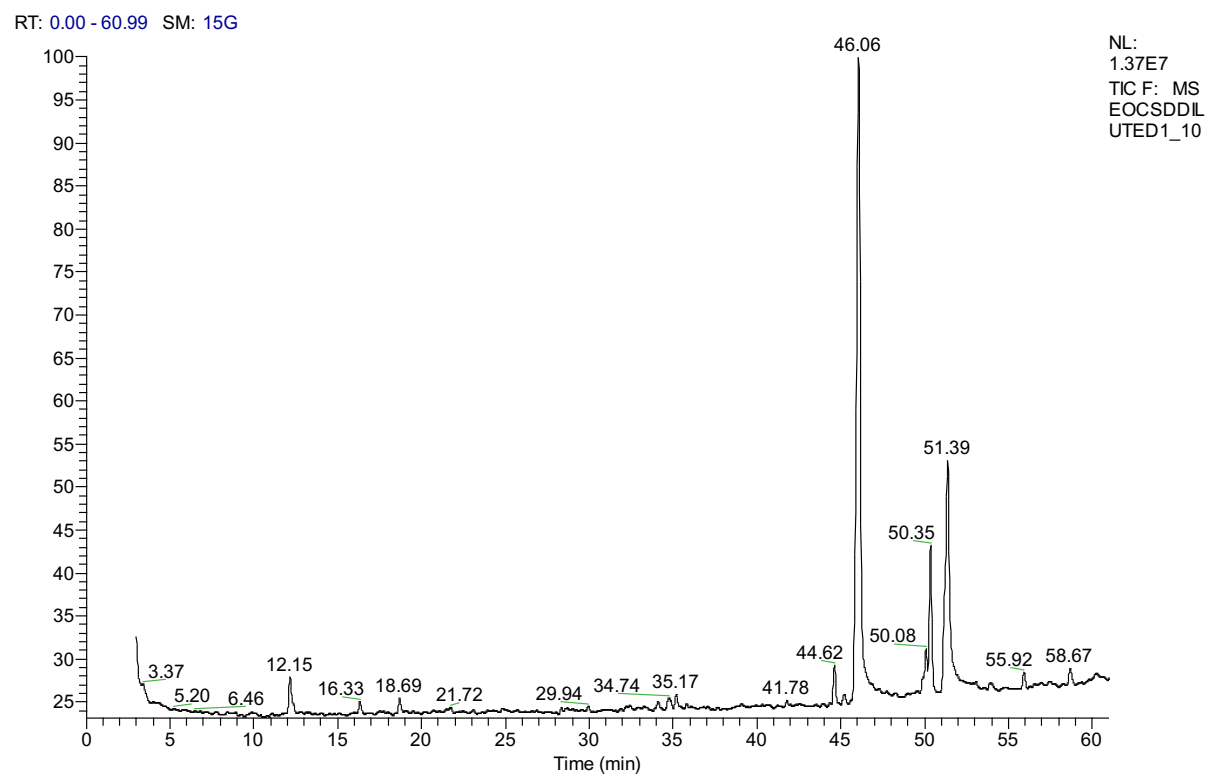

**Figure S2.** GC chromatogram of essential oils derived from *C. sinensis*.

**Table S5.** Chemical composition of volatile compounds in *C. sinensis* essential oils detected by GC–MS analysis.

| No | RT (min) | % Abundance | R Match | Compound                                  |
|----|----------|-------------|---------|-------------------------------------------|
| 1  | 12.15    | 2.72        | 898     | Linalool                                  |
| 2  | 16.33    | 1.21        | 870     | $\alpha$ -terpineol                       |
| 3  | 18.69    | 1.37        | 829     | Nerol                                     |
| 4  | 20.7     | 0.33        | 787     | 2,4-Decadienal                            |
| 5  | 21.72    | 0.79        | 835     | Bicyclo [2.1.0] pentane, 1,4-dimethyl-    |
| 6  | 23.06    | 0.26        | 900     | Naphthalene, 1,2-dihydro-4,5,7-trimethyl- |
| 7  | 24.82    | 0.35        | 854     | Phenol, 4-(1,1-dimethylpropyl)-           |
| 8  | 28.32    | 0.36        | 847     | $\beta$ -ionone (E)                       |
| 9  | 29.94    | 0.351       | 824     | Calamenene (Z)                            |
| 10 | 34.1     | 0.73        | 835     | Cubenol                                   |
| 11 | 34.74    | 1.04        | 895     | Murrolol <epi-alpha>                      |
| 12 | 35.17    | 0.98        | 937     | Murrolol <epi-alpha>                      |
| 13 | 35.8     | 0.48        | 809     | Cadalene                                  |
| 14 | 44.62    | 2.37        | 904     | Methyl hexadecanoate                      |
| 15 | 46.06    | 52.54       | 903     | n-hexadecanoic acid                       |
| 16 | 50.35    | 11.28       | 876     | Phytol                                    |
| 17 | 51.39    | 21.98       | 901     | Linolenic acid, methyl ester              |
| 18 | 55.92    | 0.85        | 856     | Tricosane                                 |



## 6. Gas chromatography–mass spectrometry of *Wedelia trilobata* essential oils

RT: 0.00 - 61.01 SM: 15G

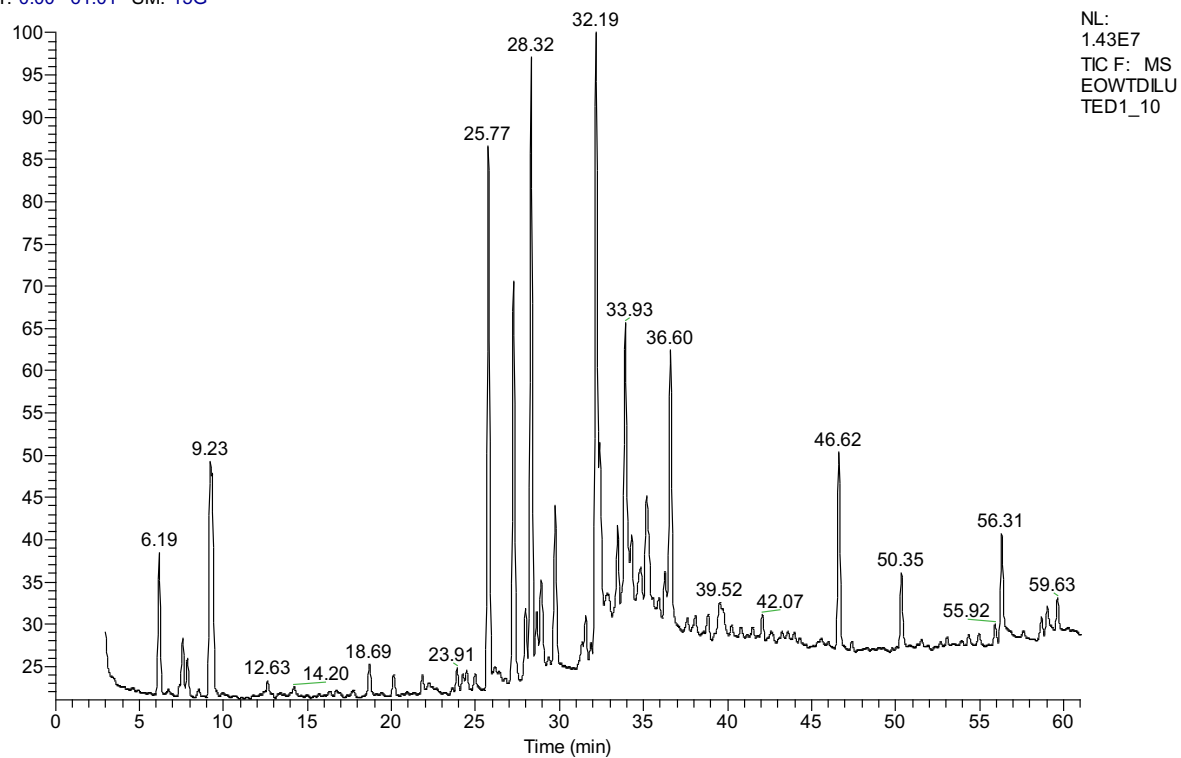

**Figure S3.** GC chromatogram of essential oils derived from *W. trilobata*.

**Table S6.** Chemical composition of volatile compounds in *W. trilobata* essential oils detected by GC–MS analysis.

| No | RT (min) | % Abundance | R Match | Compound                   |
|----|----------|-------------|---------|----------------------------|
| 1  | 6.19     | 2.51        | 944     | $\alpha$ -pinene           |
| 2  | 6.71     | 0.21        | 887     | Camphene                   |
| 3  | 7.58     | 1.25        | 940     | (-)- $\beta$ -Pinene       |
| 4  | 8.53     | 0.18        | 861     | $\alpha$ -Phellandrene     |
| 5  | 9.23     | 7.50        | 911     | $\alpha$ -Cymene           |
| 6  | 12.63    | 0.73        | 798     | Perillene                  |
| 7  | 18.69    | 0.69        | 865     | Eucarvone                  |
| 8  | 20.14    | 0.44        | 919     | Bornyl acetate             |
| 9  | 21.84    | 0.37        | 788     | Spiro [4.5] decan-6-one    |
| 10 | 23.91    | 0.63        | 918     | $\alpha$ -copaene          |
| 11 | 24.47    | 0.87        | 916     | $\alpha$ -guaiene          |
| 12 | 25.77    | 9.88        | 962     | $\beta$ -caryophyllene(E-) |
| 13 | 27.27    | 7.63        | 935     | $\alpha$ -humulene         |
| 14 | 28.32    | 12.51       | 925     | Germacrene D               |
| 15 | 28.9     | 3.09        | 917     | $\gamma$ -elemene          |
| 16 | 29.75    | 3.37        | 916     | $\delta$ -cadinene         |
| 17 | 31.55    | 1.34        | 917     | Nerolidol (E-)             |
| 18 | 32.19    | 16.98       | 936     | Spathulenol                |
| 19 | 33.46    | 1.67        | 780     | Caryophyllene oxide        |
| 20 | 33.93    | 7.89        | 932     | Junenol                    |
| 21 | 35.19    | 3.53        | 901     | Murrolol<epi- $\alpha$ ->  |
| 22 | 36.6     | 6.69        | 851     | Carotol                    |
| 23 | 37.62    | 0.35        | 710     | Spathulenol                |
| 24 | 38.09    | 0.59        | 840     | Oplopanone                 |
| 25 | 46.62    | 3.73        | 792     | Androst-2,16-diene         |
| 26 | 50.35    | 1.77        | 838     | Phytol                     |
| 27 | 55.92    | 0.35        | 896     | Tricosane                  |
| 28 | 56.31    | 2.74        | 927     | Grandiflorenic acid        |
| 29 | 58.67    | 0.50        | 893     | Eicosane                   |

## 7. Characterization of pinostrobin isolated from *Boesenbergia rotunda*

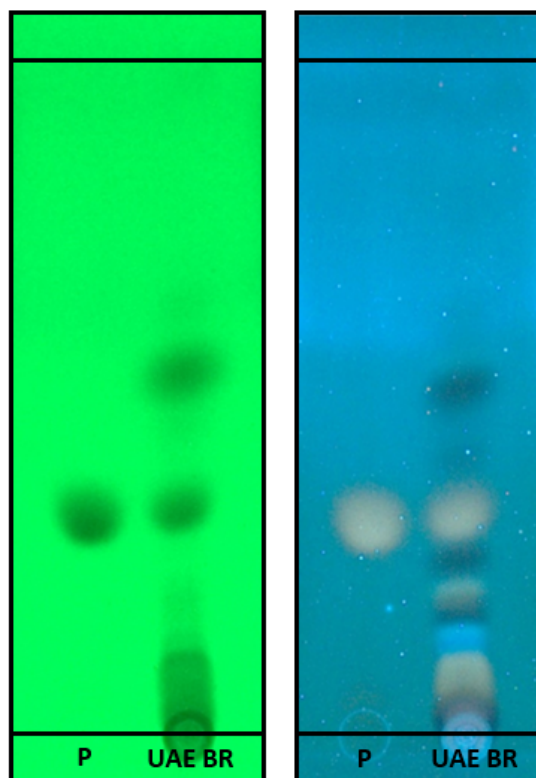

**Figure S4.** Thin layer chromatography of isolated pinostrobin (P) and hexane extract derived from *B. rotunda* (UAE BR) developed in a mobile phase system containing a co-solvent mixture of *n*-hexane:ethyl acetate (9.5:0.5 v/v) and visualization under ultraviolet lights (254 nm; green and 366 nm; blue).

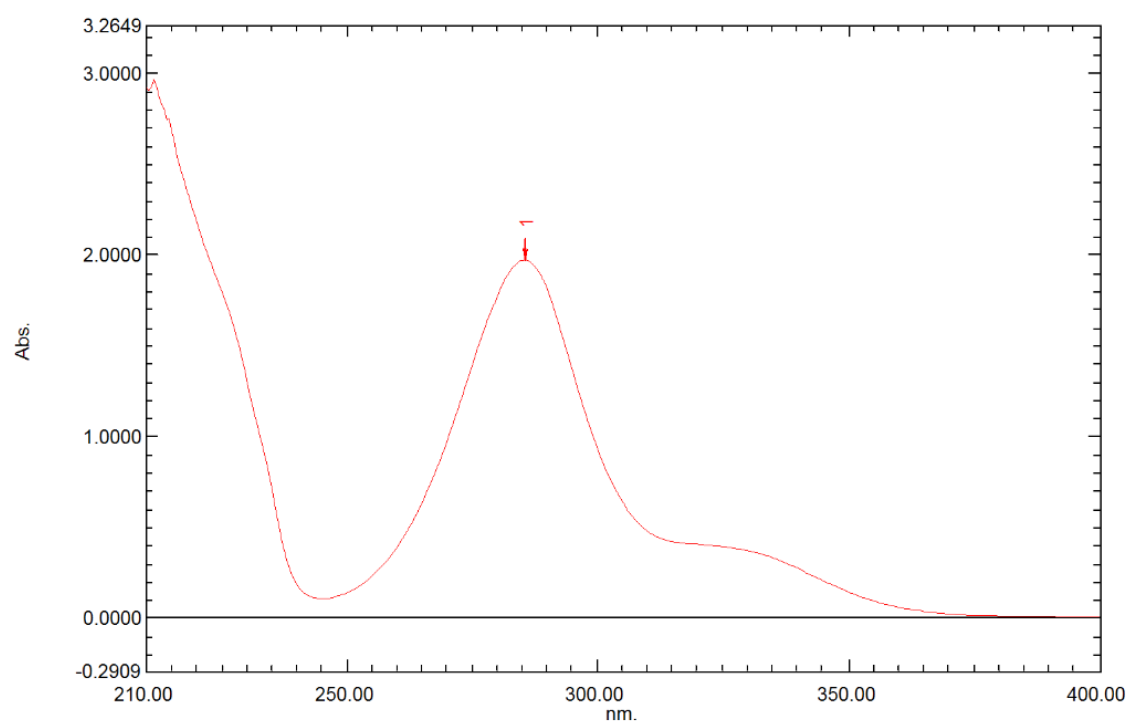

**Figure S5.** UV-Vis spectrum of pinostrobin (in methanol) at the maximum absorbance (285.5 nm).

Crystal #2703 RT: 58.95 AV: 1 SB: 45 4.24-5.15 ↑ E7  
T: + c Full ms [40.00-650.00]

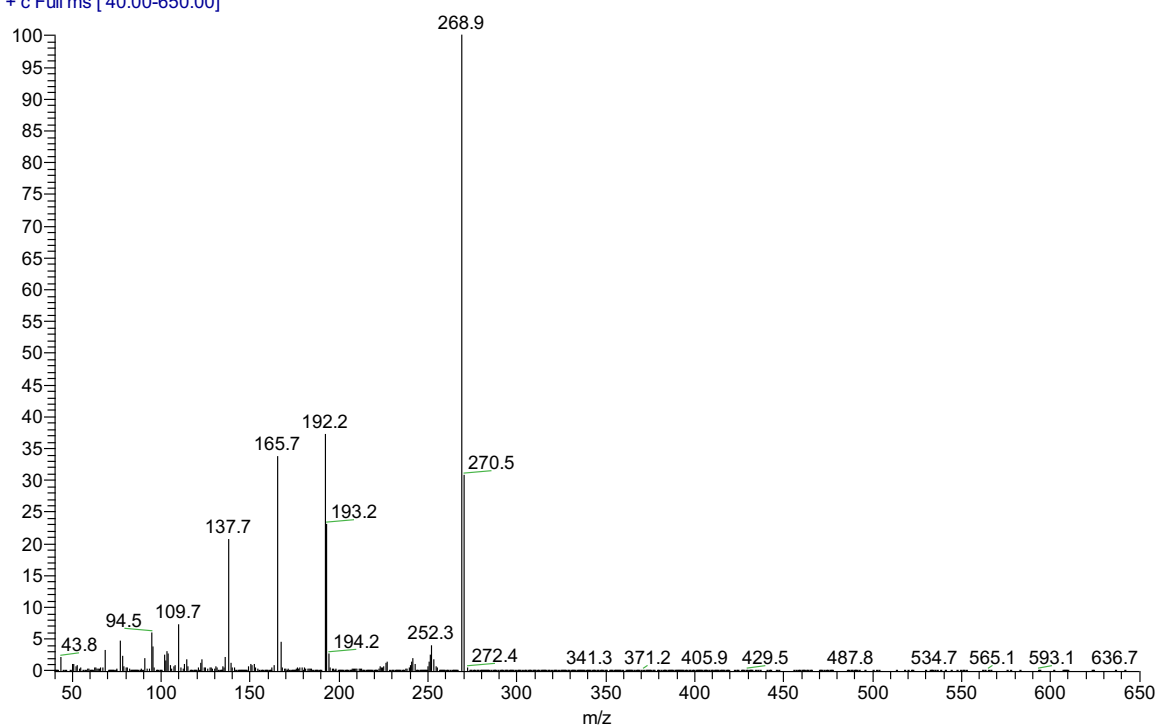

**Figure S6.** Mass spectrometry fragmentation pattern of pinostrobin using gas chromatography–mass spectrometry (GC–MS) with a DSQ quadrupole mass analyzer and an electron impact (EI) ionization positive mode at 70 eV.

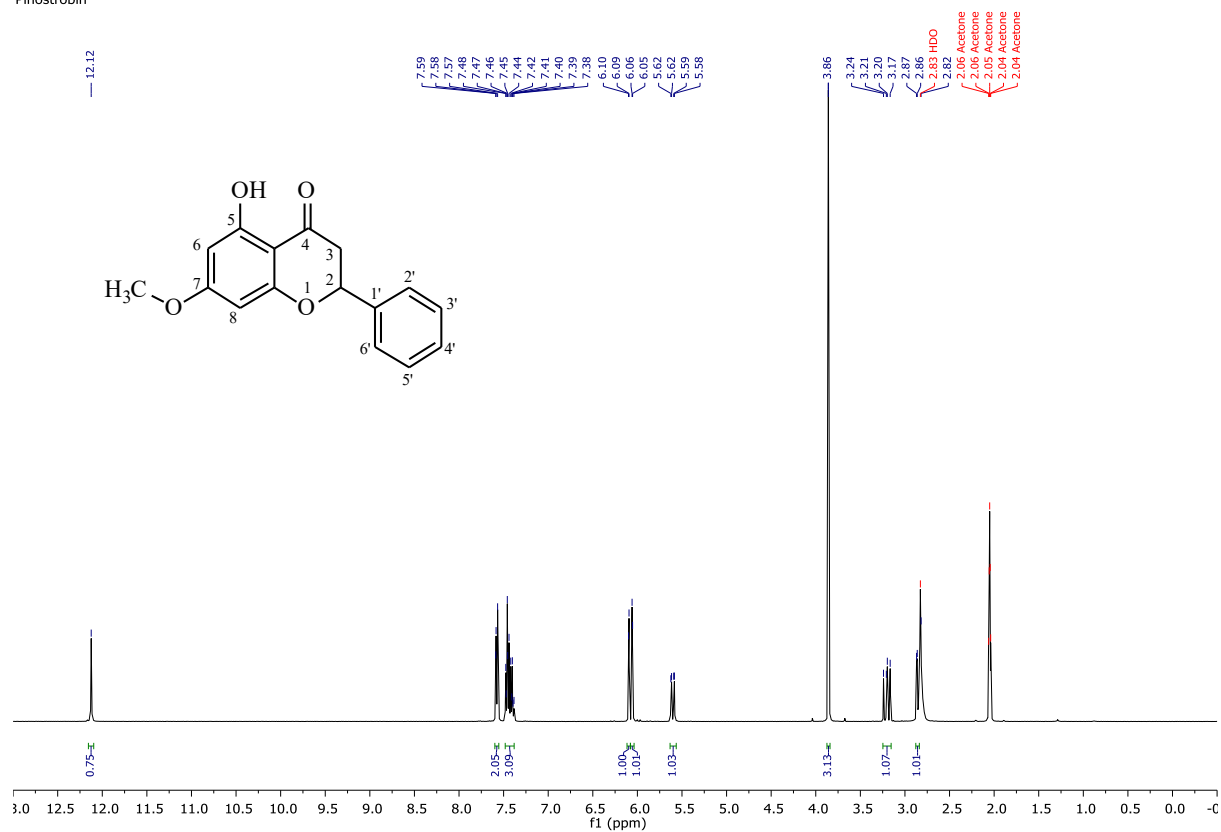

<sup>1</sup>H NMR (400 MHz, Acetone-*d*<sub>6</sub>): δ 12.12 (1H, s, 5-OH), 7.59 – 7.57 (2H, m, H-2', H-6'), 7.48 – 7.38 (3H, m, H-3', H-4', H-5'), 6.10 (1H, d, *J* = 2.3 Hz, H-8), 6.06 (1H, d, *J* = 2.3 Hz, H-6), 5.60 (1H, dd, *J* = 3.1, 12.8 Hz, H-2), 3.86 (3H, s, 7-OCH<sub>3</sub>), 3.20 (1H, dd, *J* = 12.8, 17.1 Hz, H-3<sub>ax</sub>), 2.85 (1H, dd, overlapping, H-3<sub>eq</sub>).

**Figure S7.** <sup>1</sup>H-NMR spectrum of pinostrobin (in acetone-*d*<sub>6</sub>).

8. Cyclooxygenase-2 inhibitory activity (IC<sub>50</sub>, µM) of essential oils, hexane extracts, and pinostrobin derived from *B. rotunda*

**Table S7.** Determination of IC<sub>50</sub> values of pinostrobin derived from *B. rotunda* against human cyclooxygenase-2.

| No | Samples            | IC <sub>50</sub> (µM) |        |                |        |
|----|--------------------|-----------------------|--------|----------------|--------|
|    |                    | 1                     | 2      | Mean ± SD      | Duncan |
| 1  | Pinostrobin        | 255.25                | 316.12 | 285.67 ± 43.03 | a      |
| 4  | Diclofenac sodium* | 318.74                | 261.96 | 290.35 ± 40.14 | a      |
| 5  | BD**               | 248.31                | 231.86 | 240.09 ± 11.63 | a      |

\*Diclofenac sodium is a positive control.

\*\*BD: betamethasone dipropionate is an atopic dermatitis standard drug.

9. 5-Lipoxygenase inhibitory activity (IC<sub>50</sub>, µg/mL) of essential oils, hexane extracts, and pinostrobin derived from *B. rotunda*

**Table S8.** Determination of IC<sub>50</sub> values of EOs, hexane extracts, and pinostrobin derived from *B. rotunda* against human 5-lipoxygenase.

| No | Samples     | IC <sub>50</sub> , µg/mL |        |        |        |       |                | Duncan |
|----|-------------|--------------------------|--------|--------|--------|-------|----------------|--------|
|    |             | 1                        | 2      | 3      | 4      | 5     | Mean ± SD      |        |
| 1  | Pinostrobin | 0.147                    | 0.101  | 0.098  | 0.179  | 0.149 | 0.135 ± 0.035  | a      |
| 2  | UAE BR      | 11.390                   | 12.020 | 11.600 | 12.910 | 9.078 | 11.399 ± 1.423 | c      |
| 3  | EO BR       | 1.763                    | 1.449  | 1.432  | 1.732  | 1.682 | 1.612 ± 0.159  | b      |
| 4  | NDGA**      | 1.256                    | 1.458  | 1.210  | 1.730  | 1.936 | 1.518 ± 0.311  | b      |
| 5  | BD***       | 0.847                    | 0.936  | 0.895  | 1.315  | 1.246 | 1.048 ± 0.216  | b      |

\*Note: UAE: hexane extract; EO: essential oils; and BR: *B. rotunda*; five replicate wells were generated from two rounds of testing. One-way ANOVA was performed to compare the mean of each sample, and different letters indicate the significant difference of the mean.

\*\*NDGA: nordihydroguaiaretic acid is a positive control.

\*\*\*BD: betamethasone dipropionate is an atopic dermatitis standard drug.

# 10. Steady-state kinetics of 5-lipoxygenase in the presence of inhibitor NDGA and pinostrobin

**Table S9.** Calculated kinetic parameter values of pinostrobin compared to NDGA by the mixed-type inhibition.

| Mixed-type Inhibition | NDGA                   | Pinostrobin            |
|-----------------------|------------------------|------------------------|
| $V_{\max}$ (M/s)      | $7.888 \times 10^{-6}$ | $8.064 \times 10^{-6}$ |
| $K_m$ ( $\mu$ M)      | 3.919                  | 3.249                  |
| $K_i$ ( $\mu$ M)      | 3.376                  | 2.284                  |

\*Note: NDGA = nordihydroguaiaretic acid;  $V_{\max}$  = maximum enzyme velocity;  $K_m$  = Michaelis-Menten constant;  $K_i$  = inhibition constant.

**Table S10.** Human recombinant 5-lipoxygenase velocity and Michaelis-Menten constant in the presence of NDGA and pinostrobin.

| Substrate concentration ( $\mu$ M) | Control (no inhibitor) | NDGA ( $\mu$ g/mL)     |                        |                        | Pinostrobin ( $\mu$ g/mL) |                        |                        |
|------------------------------------|------------------------|------------------------|------------------------|------------------------|---------------------------|------------------------|------------------------|
|                                    |                        | 1.56                   | 3.125                  | 6.25                   | 1.56                      | 3.125                  | 6.25                   |
| 66.67                              | 0.0000090934           | 0.00000581159          | 0.0000060934           | 0.00000637037          | 0.00000548                | 0.00000548             | 0.00000559             |
| 33.335                             | 0.0000077053           | 0.00000374396          | 0.0000044203           | 0.00000508776          | 0.00000375                | 0.00000417             | 0.00000423             |
| 16.6675                            | 0.0000064549           | 0.00000277295          | 0.0000035853           | 0.00000395089          | 0.00000293                | 0.00000325             | 0.00000333             |
| 8.33375                            | 0.0000065628           | 0.00000195652          | 0.0000035878           | 0.00000397907          | 0.00000262                | 0.00000297             | 0.00000311             |
| $V_{\max}$ (M/s)                   | $9.068 \times 10^{-6}$ | $8.695 \times 10^{-6}$ | $6.364 \times 10^{-6}$ | $6.662 \times 10^{-6}$ | $6.477 \times 10^{-6}$    | $6.073 \times 10^{-6}$ | $6.097 \times 10^{-6}$ |
| $K_m$ ( $\mu$ M)                   | 4.259                  | 36.40                  | 9.402                  | 7.823                  | 17.44                     | 11.60                  | 10.85                  |

\*Note: NDGA = nordihydroguaiaretic acid;  $V_{\max}$  and  $K_m$  were calculated using the Michaelis-Menten formula in GraphPad Prism v.9.



## 11. Molecular modeling of NDGA to human 5-lipoxygenase (PDB ID: 6N2W)

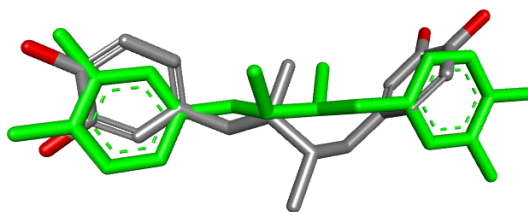

**Figure S8.** Superimposition of the lowest energy conformer of docked nordihydroguaiaretic acid (NGDA) and the co-crystallized NGDA in the 5-lipoxygenase binding site.
